# Supplementary material
Source: PubMed Central journal article supplement (PMC4232213)
Supplement: NIHMS639844-supplement-supporting_information.pdf [file NIHMS639844-supplement-supporting_information.pdf]

## Supporting Information

### List of references surveyed in the introduction

1. Glocker, M.O.; Kalkum, M.; Yamamoto, R.; Schreurs, J. *Biochemistry* **1996**, *35*, 14625-14633.
2. Dage, J.L.; Sun, H.; Halsall H.B. *Anal. Biochem.* **1998**, *257*, 176-185.
3. Kalkum, M.; Przybylski, M.; Glocker, M.O. *Bioconj. Chem.* **1998**, *9*, 226-235.
4. Tsubaki, M.; Kobayashi, K.; Ichise, T.; Takeuchi, F.; Tagawa, S. *Biochemistry* **2000**, *39*, 3276-3284.
5. Qin, K.; Yang, Y.; Mastrangelo, P.; Westaway, D. *J. Biol. Chem.* **2002**, *277*, 1981-1990.
6. Alderton, A.L.; Faustman, C.; Liebler, D.C.; Hill, D.W. *Biochemistry* **2003**, *42*, 4398-4405.
7. Jin, X.R.; Abe, Y.; Li, C.Y.; Hamasaki, N. *Biochemistry* **2003**, *42*, 12927-12932.
8. Hassani, O.; Mansuelle, P.; Cestele, S.; Bourdeaux, M.; Rochat, H.; Sampieri, F. *Eur. J. Biochem.* **1999**, *260*, 76-86.
9. Takahashi, T.; Hiramoto, S.; Wato, S.; Nishimoto, T.; Wada, Y.; Nagai, K.; Yamaguchi, H. *J. Biochem.* **1999**, *126*, 838-844.
10. Marie, G.; Serani, L.; Laprevote, O.; Cahuzac, B.; Guittet, E.; Felenbok, B. *Protein Sci.* **2001**, *10*, 99-107.
11. Strohm, M.; Santrucek, J.; Hynek, R.; Kodicek, M. *Biochem. Biophys. Res. Comm.* **2004**, *323*, 1134-1138.
12. Ploemen, J.H.T.M.; Johnson, W.W.; Jespersen, S.; Vanderwall, D.; van Ommen, B.; van der Greef, J.; van Bladeren, P.J.; Armstrong, R.N. *J. Biol. Chem.* **1994**, *269*, 26890-26897.
13. Hobba, G.D.; Forbes, B.E.; Parkinson, E.J.; Francis, G.L.; Wallace, J.C. *J. Biol. Chem.* **1996**, *271*, 30529-30536.
14. Mailfait, S.; Belaiche, D.; Kouach, M.; Dallery, N.; Chavatte, P.; Formstecher, P.; Sablonniere, B. *Biochemistry* **2000**, *39*, 2183-2192.
15. Leite, J.F.; Cascio, M. *Biochemistry* **2002**, *41*, 6140-6148.
16. D'Ambrosio, C.; Talamo, F.; Vitale, R.M.; Amodeo, P.; Tell, G.; Ferrara, L.; Scalon, A. *Biochemistry* **2003**, *42*, 4430-4443.
17. Santrucek, J.; Strohm, M.; Kadlcik, V.; Hynek, R.; Kodicek, M. *Biochem. Biophys. Res. Comm.* **2004**, *323*, 1151-1156.
18. Carven, G.J.; Stern, L.J. *Biochemistry* **2005**, *44*, 13625-13637.
19. Yem, A.W.; Epps, D.E.; Mathews, W.R.; Guido, D.M.; Richard, K.A.; Staite, N.D.; Deibel, M.R. *J. Biol. Chem.* **1992**, *267*, 3122-3128.
20. Vilbois, F.; Caspers, P.; Da Prada, M.; Lang, G.; Barrer, C.; Lahm, H.; Cesura, A.M. *Eur. J. Biochem.* **1994**, *222*, 377-386.
21. De Peredo, A.G.; Saint-Pierre, C.; Adrait, A.; Jacquamet, L.; Latour, J.; Michaud-Soret, I.; Forest, E. *Biochemistry* **1999**, *38*, 8582-8589.
22. Barbirz, S.; Jakob, U.; Glocker, M.O. *J. Biol. Chem.* **2000**, *275*, 18759-18766.
23. Britto, P.J.; Knipling, L.; Wolff, J. *J. Biol. Chem.* **2002**, *277*, 29018-29027.
24. Maithal, K.; Ravindra, G.; Balaram, H.; Balaram, P. *J. Biol. Chem.* **2002**, *277*, 25106-25114.
25. Turner, B.T.; Sabo, M.T.; Wilding, D.; Maurer, M.C. *Biochemistry* **2004**, *43*, 9755-9765.
26. Bauer, P.J.; Krause, E. *Biochemistry* **2005**, *44*, 1624-1634.
27. Knock, S.L.; Miller, B.T.; Blankenship, J.E.; Nagle, G.T.; Smith, J.S.; Kurosky, A. *J. Biol. Chem.* **1991**, *266*, 24413-24419.

28. Glocker, M.O.; Borchers, C.; Fiedler, W.; Suckau, D.; Przybylski, M. *Bioconjugate Chem.* **1994**, *5*, 583-590.
29. Ehrhardm B.; Misselwitz, R.; Welfle, K.; Hausdorf, G.; Glaser, R.W.; Schneider-Mergener, J.; Welfle, H. *Biochemistry* **1996**, *35*, 9097-9105.
30. Delforge, D.; Devreese, B.; Dieu, M.; Delaive, E.; Van Beeumen, J.; Remacle, J. *J. Biol. Chem.* **1997**, *272*, 2276-2284.
31. Scaloni, A.; Monti, M.; Acquaviva, R.; Tell, G.; Damante, G.; Formisano, S.; Pucci, P. *Biochemistry* **1999**, *38*, 64-72.
32. Hochleitner, E.O.; Borchers, C.; Parker, C.; Bienstock, R.J.; Tomer, K.B. *Protein Sci.* **2000**, *9*, 487-496.
33. Kvaratskhelia, M.; Miller, J.T.; Budihias, S.R.; Pannell L.K.; Le Grice, F.F.J. *Proc. Natl. Acad. Sci. USA* **2002**, *99*, 15988-15993.
34. Novak, P.; Kruppa, G.H.; Young, M.M.; Schoeniger, J. *J. Mass Spectrom.* **2004**, *39*, 322-328.
35. Scholten, A.; Visser, N.F.C.; van den Heuvel, R.H.H.; Heck, A.J.R. *J. Am. Soc. Mass Spectrom.* **2006**, *17*, 983-994.
36. Nikfarjam, L.; Izumi, S.; Yamazaki, T.; Kominami, S. *Biochim. Biophys. Acta* **2006**, *1764*, 1126-1131.
37. Suckau, D.; Mak, M.; Przybylski, M. *Proc. Natl. Acad. Sci. USA* **2002**, *89*, 5630-5634.
38. Calvete, J.J.; Campanero-Rhodes, M.A.; Raida, M.; Sanz, L. *FEBS Letters* **1999**, *444*, 260-264.
39. Schepens, I.; Ruelland, E.; Miginiac-Maslow, M.; Marechal, P.; Decottignies, P. *J. Biol. Chem.* **2000**, *275*, 35792-35798.
40. Hager-Braun, C; Tomer, K.B. *Biochemistry* **2002**, *41*, 1759-1766.
41. Linder, M.D.; Morkunaite-Haimi, S.; Kinnunen, P.K.; Bernardi, P.; Eriksson, O. *J. Biol. Chem.* **2002**, *277*, 937-942.
42. Leitner, A.; Lindner, W. *Anal. Chem.* **2005**, *77*, 4481-4488.
43. Akinsiku, O.T.; Yu, E.T.; Fabris, D. *J. Mass Spectrom.* **2005**, *40*, 1372-1381.
44. Sanderson, R.J.; Mosbaugh, D.W. *J. Biol. Chem.* **1996**, *271*, 29170-29181.
45. Akash, S.; Shirouzu, M.; Terada, T.; Ito, Y.; Yokohama, S.; Takio, K. *Anal. Biochem.* **1997**, *248*, 15-25.
46. Izumi, S.; Kaneko, H.; Yamazaki, T.; Hirata, T.; Kominami, S. *Biochemistry* **2003**, *42*, 14663-14669.
47. Herrmann, A.; Claeson, S.P.; Gullbo, J.; Bohlin, L.; Goransson, U. *Cell. Mol. Life Sci.* **2006**, *63*, 235-245.
48. Gao, J.; Zhang, F.; Zhang, L.; Guo, Y.; Ruan, K.; Jiang, D.; Xu, C. *Acta Biochimica et Biophysica Sinica* **2007**, *38*, 611-619.
49. Nuss, J.E.; Sweeney, D.J.; Alter, G.M. *Biochemistry* **2006**, *45*, 9804-9818.
50. Cutalo, J.M.; Darden, T.A.; Kunkel, T.A.; Tomer, K.B. *Biochemistry* **2006**, *45*, 15458-15467.
51. Gao, Y.; Wang, Y. *Biochemistry* **2006**, *45*, 15645-15660.
52. Narindrasorasak, S.; Kulkarni, P.; Deschamps, P.; She, Y.; Sarkar, B. *Biochemistry* **2007**, *46*, 3116-3128.
53. Lennon, C.W.; Cox, H.D.; Hennelly, S.P.; Chelmo, S.J.; McGuirl, M.A. *Biochemistry* **2007**, *46*, 4850-4860.
54. Knee, K.M.; Roden, C.K.; Flory, M.R.; Mukerji, I. *Biophys. Chem.* **2007**, *127*, 181-193.
55. Okado-Matsumoto, A.; Guan, Z.; Fridovich, I. *Free Radical Bio. Med.* **2006**, *41*, 1837-1846.

56. Williams, J.G.; Tomer, K.B.; Hioe, C.E.; Zolla-Pazner, S.; Norris, P.J. *J. Am. Soc. Mass Spectrom.* **2007**, *17*, 1560-1569.
57. Azim-Zadeh, O.; Hillebrecht, A.; Linne, U.; Marahiel, M.A.; Klebe, G.; Lingelbach, K.; Nyalwidhe, J. *J. Biol. Chem.* **2007**, *282*, 21609-21617.
58. Whitehurst, C.B.; Soderblom, E.J.; West, M.L.; Hernandez, R.; Goshe, M.B.; Brown, D.T. *J. Virol.* **2007**, *81*, 6231-6240.
59. Macpherson, L.J.; Dubin, A.E.; Evans, M.J.; Marr, F.; Schultz, P.G.; Cravatt, B.F.; Patapoutian, A. *Nature* **2007**, *445*, 541-545.
60. Ladner, C.L.; Turner, R.J.; Edwards R.A. *Protein Sci.* **2007**, *16*, 1204-1213.
61. Leitner, A.; Amon, S.; Rizzi, A.; Lindner, W. *Rapid Comm. Mass Spectrom.* **2007**, *21*, 1321-1330.

|                                                               |                   |
|---------------------------------------------------------------|-------------------|
| Papers using CD to check protein structure:                   | 7 of 61 (11.5 %)  |
| Papers using fluorescence to check protein structure:         | 3 of 61 (4.9 %)   |
| Papers minimizing total modifications:                        | 1 of 61 (1.6 %)   |
| Papers using activity assays to check effect of modification: | 13 of 61 (21.3 %) |
| Papers using nothing to ensure protein structural integrity:  | 37 of 61 (61 %)   |

MS/MS spectra of all the peptides in Tables 1, 2, and 3 of the manuscript  
(except the two peptides shown in Figure 1 of the manuscript)

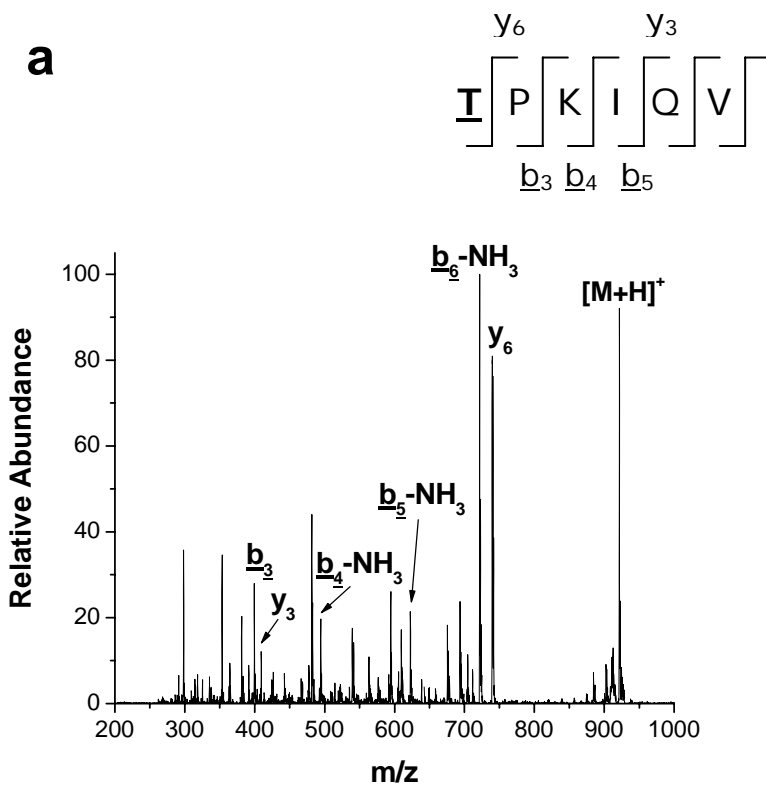

**b**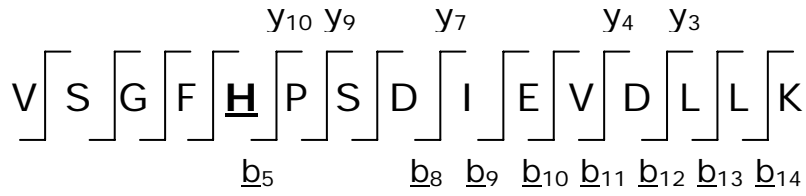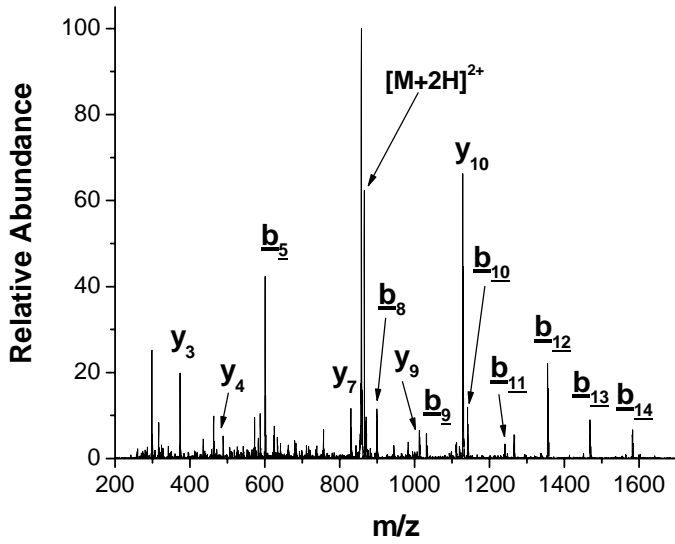**c**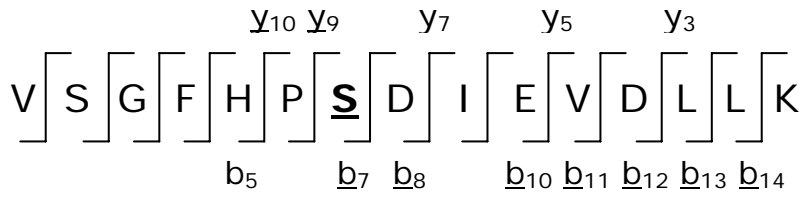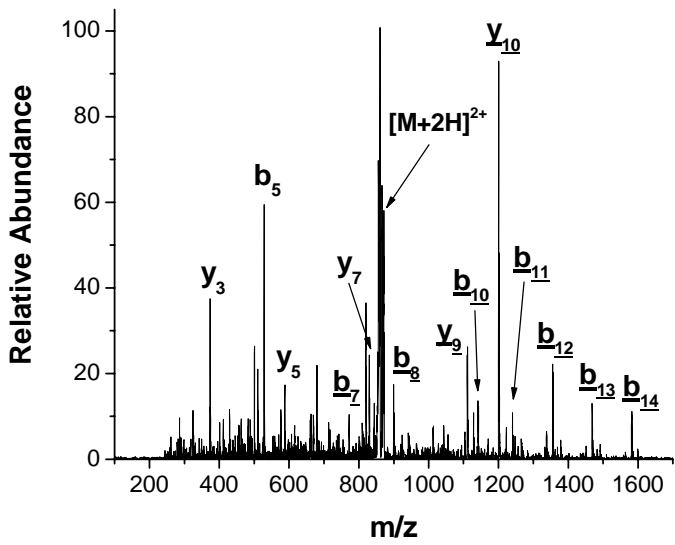

**Q**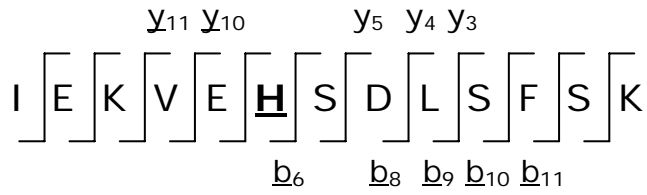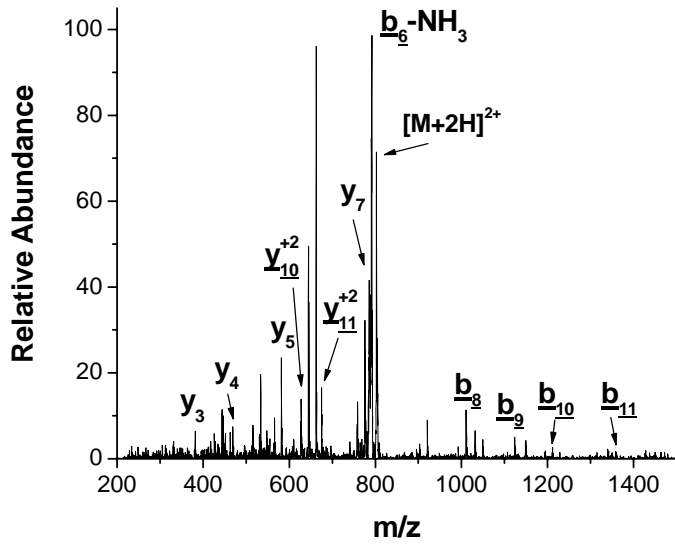**Q**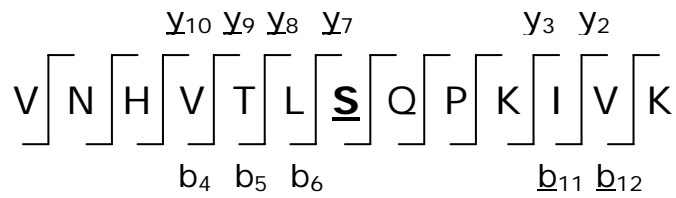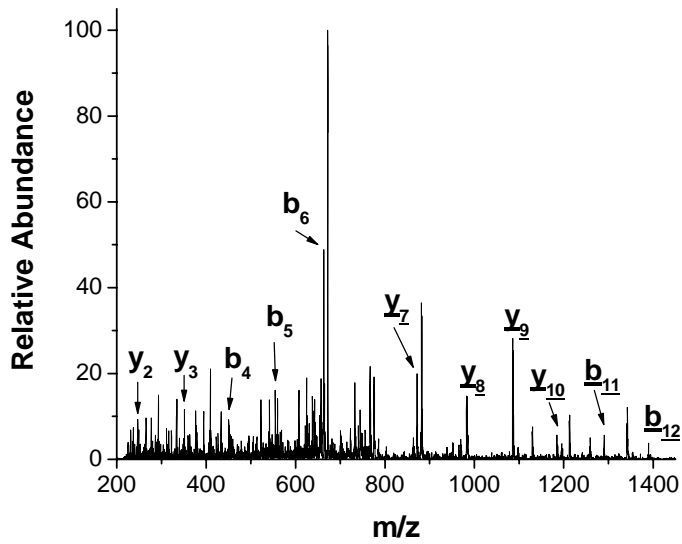



**h**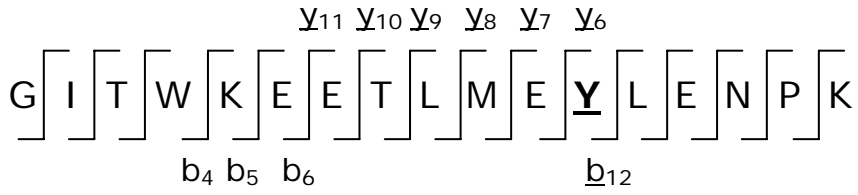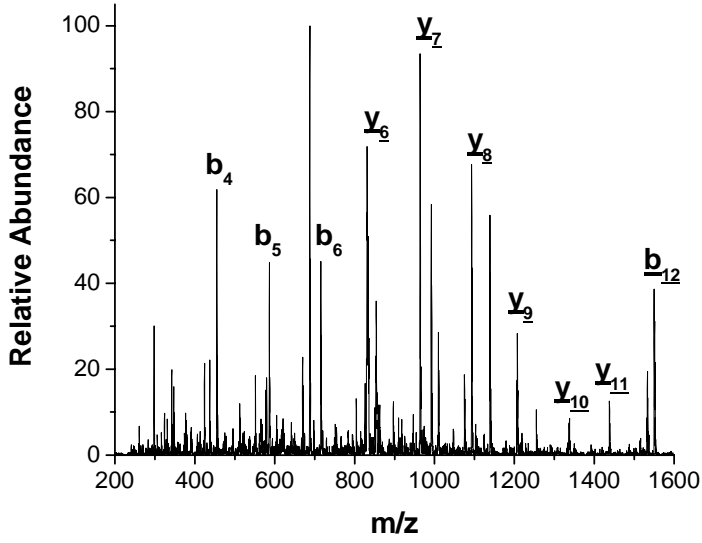**i**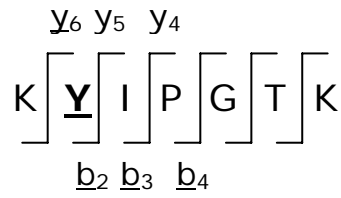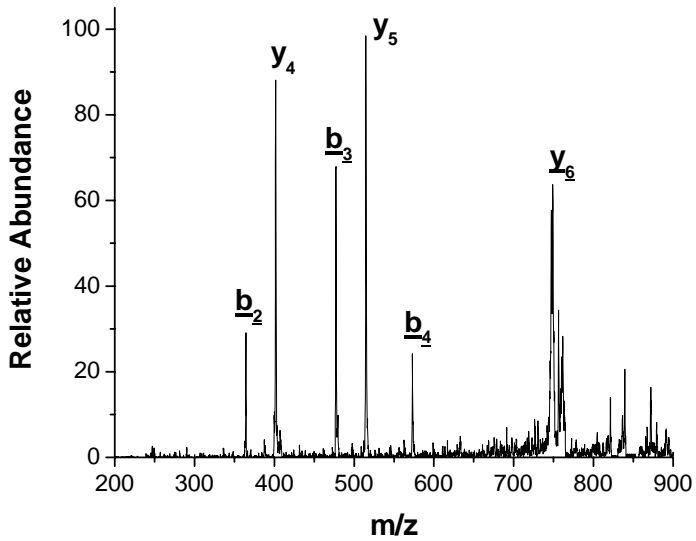

**j**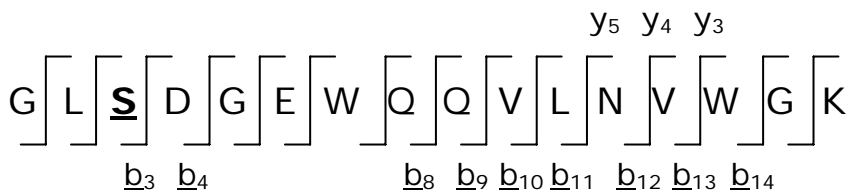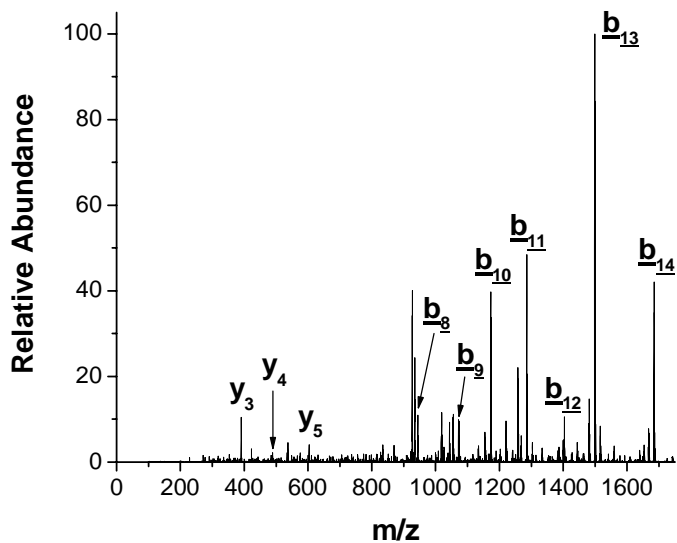**k**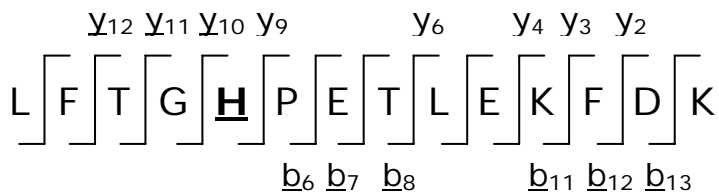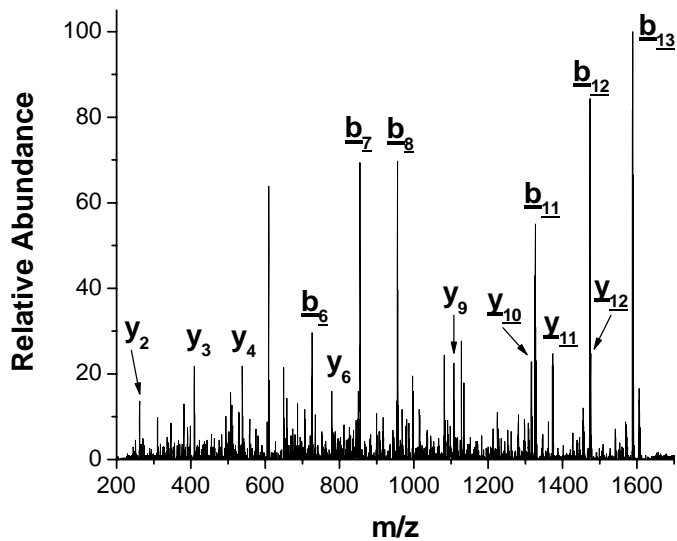





**n**  $y_{16}$   $y_{15}$   $y_{14}$   $y_{13}$   $y_{12}$   $y_{11}$   $y_{10}$   $y_9$

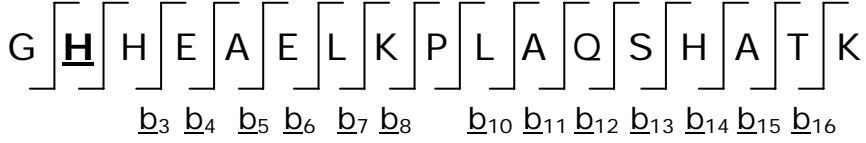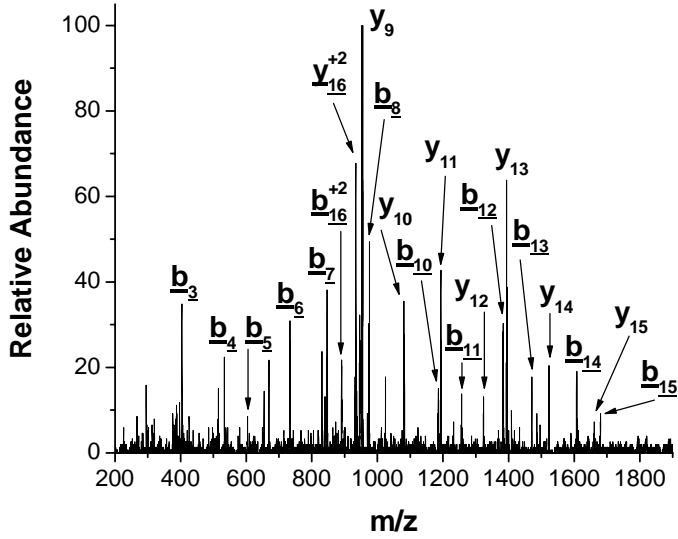

**o**

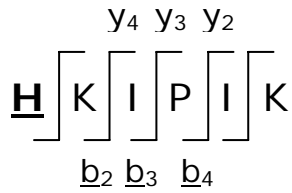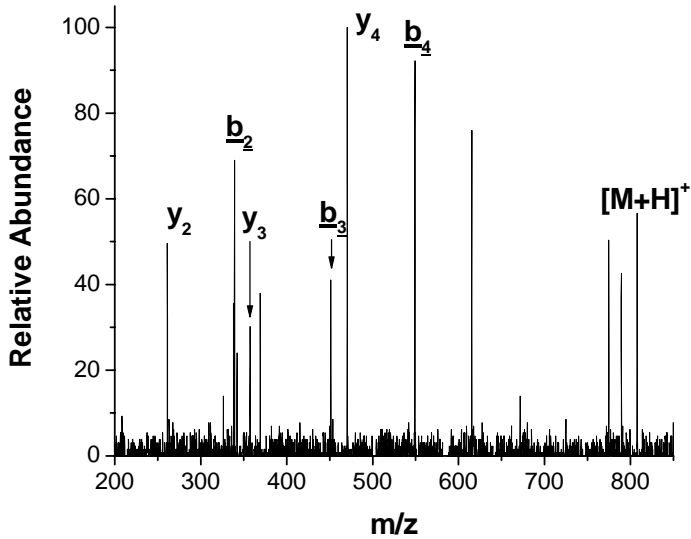

**Figure S1:** MS/MS spectra showing modification of (a) Thr4 of  $\beta$ 2m, (b) His31 of  $\beta$ 2m, (c) Ser33 of  $\beta$ 2m, (d) His51 of  $\beta$ 2m, (e) Ser88 of  $\beta$ 2m, (f) His26 of cytochrome c, (g) Tyr48 of cytochrome c, (h) Tyr67 of cytochrome c, (i) Tyr74 of cytochrome c, (j) N-terminal/Ser3 of myoglobin, (k) His36 of myoglobin, (l) His48 of myoglobin, (m) His64 of myoglobin, (n) His81 of myoglobin, and (o) His97 of myoglobin.

Dose-response plot showing the effect of protein concentration on reactivity

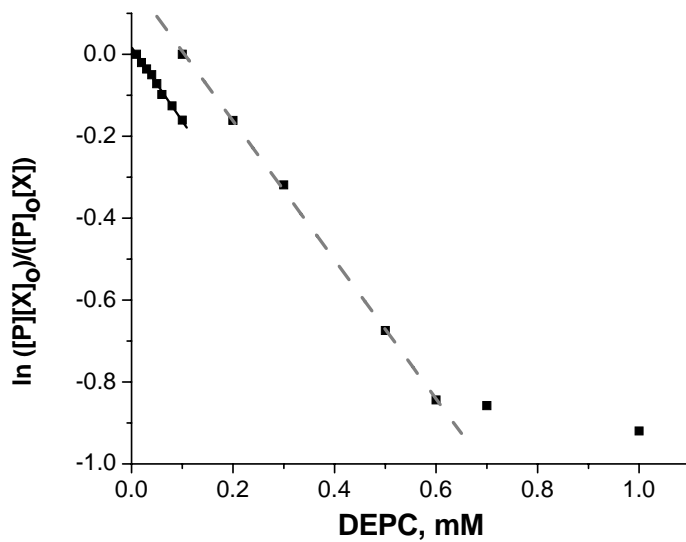

**Figure S2:** Dose-response plot showing the effect of protein concentration on the DEPC modification rate. The modification rate coefficients,  $k$ , are  $0.027 \pm 0.001$  for  $10 \mu\text{M}$  (black straight line) and  $0.0268 \pm 0.0004$  for  $100 \mu\text{M}$  (gray dashed line). The  $k$  values are obtained by dividing the measured slope by the reaction time.
